# Supplementary material for: Azolla along a phosphorus gradient: biphasic growth response linked to diazotroph traits and phosphorus-induced iron chlorosis
Source: PubMed Central journal article supplement (PMC5849758; doi:10.1038/s41598-018-22760-5), 2018-03-13
Supplement: 41598_2018_22760_MOESM1_ESM.pdf [file 41598_2018_22760_MOESM1_ESM.pdf]

**Article title:** *Azolla* along a phosphorus gradient: biphasic growth response linked to diazotroph traits and phosphorus-induced iron chlorosis

**Authors:** Ralph J.M. Temmink, Sarah F. Harpenslager, Alfons J.P. Smolders, Gijs van Dijk, Roy C.J.H. Peters, Leon P.M. Lamers, Monique M.L. van Kempen

### Supplementary Information

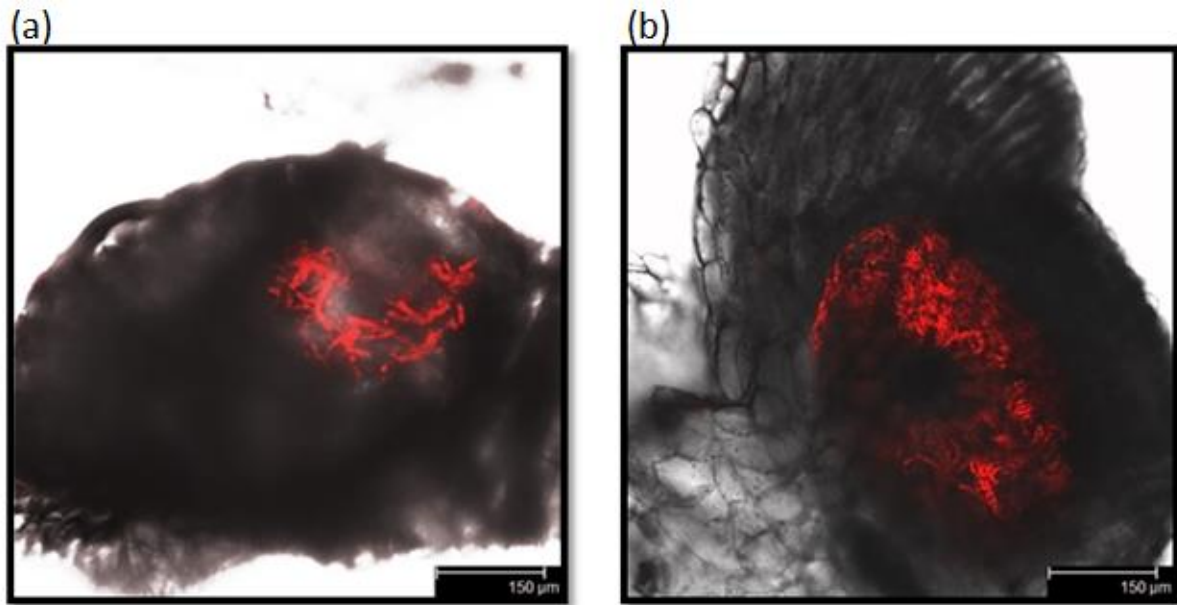

**Supplementary Figure S1.** CLSM image (overlay) of the lowest leaf (dorsal lobe) of *A. filiculoides* visualizing its diazotrophic cyanobacteria (red autofluorescence), grown at (a) 0.5 and (b) 100  $\mu\text{mol P l}^{-1}$ . Grey cells represent photosynthetic cells. Diazotroph distribution in the *Azolla* leaf cavity was visualized using a Confocal Laser Scanning Microscope (CLSM; TCS SP2 AOBS, Leica-microsystems, Mannheim, Germany). The lowest leaf at the main axis was used, as this is known to host the highest number of diazotrophs (REF). A complete leaf was placed under a cover slip in Kaisers Glycerin gelatin medium, and a 20x objective was used to create the images (excitation 488 nm at 51%, 496 nm at 41%, 514 nm at 40%, 561 nm at 55%; emission 577-671 nm; intensification 529 volt; pinhole 50-250  $\mu\text{m}$ ). Images were taken at different depths within the sample (z-stacks). The most detailed transmission image of the *Azolla* leaf and the most detailed autofluorescence image of the cyanobionts were combined using Adobe Photoshop CS6 (Adobe Systems Inc., San Jos, CA, U.S.A.). Picture: R. Temmink and L. Pierson.

**Supplementary Table S1.** Chemical composition of the N-free nutrient solution, based on field conditions of natural stands (de Lyon & Roelofs, 1986). Different P treatments were created by adding 0.5, 2, 10, 50 or 100  $\mu\text{mol P l}^{-1}$  ( $\text{NaH}_2\text{PO}_4 \cdot 2\text{H}_2\text{O}$ ) to the medium.

| Element                                    | Concentration ( $\mu\text{mol l}^{-1}$ ) |
|--------------------------------------------|------------------------------------------|
| $\text{NaHCO}_3$                           | 1000                                     |
| $\text{CaCl}_2 \cdot 2\text{H}_2\text{O}$  | 1000                                     |
| $\text{K}_2\text{SO}_4$                    | 500                                      |
| $\text{MgSO}_4 \cdot 7\text{H}_2\text{O}$  | 500                                      |
| Fe-EDTA                                    | 10                                       |
| $\text{CuSO}_4 \cdot 5\text{H}_2\text{O}$  | 1                                        |
| $\text{MnCl}_2 \cdot 4\text{H}_2\text{O}$  | 20                                       |
| $\text{ZnSO}_4 \cdot 7\text{H}_2\text{O}$  | 10                                       |
| $\text{NaMoO}_4 \cdot 2\text{H}_2\text{O}$ | 3                                        |
| $\text{H}_3\text{BO}_3$                    | 20                                       |
| $\text{CoCl}_2 \cdot 6\text{H}_2\text{O}$  | 4                                        |
| NaCl                                       | 10                                       |

**Supplementary Table S2.** Statistical results of the effects of 0.5, 2, 10, 50 and 100  $\mu\text{mol P l}^{-1}$  ( $n=5$ ) treatments for the relative growth rate (RGR;  $\text{g g}^{-1} \text{DW d}^{-1}$ ), N : P ratio ( $\text{mol mol}^{-1}$ ), N content ( $\mu\text{mol N g}^{-1} \text{DW}$ ), P content ( $\mu\text{mol P g}^{-1} \text{DW}$ ), P sequestration rate ( $\mu\text{mol P m}^{-2} \text{d}^{-1}$ ), N sequestration rate ( $\text{mmol N m}^{-2} \text{d}^{-1}$ ), chlorophyll a + b ( $\text{mg g}^{-1} \text{DW}$ ; experiment 2) and N content ( $\mu\text{mol N g}^{-1} \text{DW}$ ; experiment 2);  $\pm\text{SE}$ . Significant differences are indicated by different letters.

| Relative growth rate ( $\text{g g}^{-1} \text{DW d}^{-1}$ ) |           |                |          |            |                                          |                      |
|-------------------------------------------------------------|-----------|----------------|----------|------------|------------------------------------------|----------------------|
|                                                             | <i>df</i> | <i>F value</i> | <i>P</i> | Phosphorus | Tukey HSD                                | pairwise comparisons |
| ANOVA                                                       | 4         | 12.072         | <0.001   | 0.5        | $0.06 \pm 0.005$                         | a                    |
|                                                             |           |                |          | 2          | $0.06 \pm 0.003$                         | a                    |
|                                                             |           |                |          | 10         | $0.1 \pm 0.01$                           | b                    |
|                                                             |           |                |          | 50         | $0.1 \pm 0.01$                           | b                    |
|                                                             |           |                |          | 100        | $0.1 \pm 0.009$                          | b                    |
| N : P ratio ( $\text{mol mol}^{-1}$ )                       |           |                |          |            |                                          |                      |
|                                                             | <i>df</i> | <i>F value</i> | <i>p</i> | Phosphorus | Bonferroni adjusted pairwise comparisons |                      |
| LMM (Covariance)                                            | 4         | 733.53         | <0.001   | 0.5        | $36.9 \pm 0.6$                           | a                    |
|                                                             |           |                |          | 2          | $30.6 \pm 0.5$                           | b                    |

|                                                                |           |                |          |            |                                          |   |
|----------------------------------------------------------------|-----------|----------------|----------|------------|------------------------------------------|---|
| type:<br>unstructured)                                         |           |                |          | 10         | 16.1 ± 0.5                               | c |
|                                                                |           |                |          | 50         | 10.5 ± 0.5                               | d |
|                                                                |           |                |          | 100        | 9.3 ± 0.5                                | d |
| N content (μmol N g <sup>-1</sup> DW)                          |           |                |          |            |                                          |   |
|                                                                | <i>df</i> | <i>F value</i> | <i>P</i> | Phosphorus | Bonferroni adjusted pairwise comparisons |   |
| LMM plant response<br>(Covariance type:<br>unstructured)       | 4         | 167.82         | <0.001   | 0.5        | 1983 ± 19.4                              | a |
|                                                                |           |                |          | 2          | 2040 ± 15.3                              | a |
|                                                                |           |                |          | 10         | 2155 ± 15.3                              | b |
|                                                                |           |                |          | 50         | 2510 ± 15.3                              | d |
|                                                                |           |                |          | 100        | 2271 ± 15.3                              | c |
| P content (μmol N g <sup>-1</sup> DW)                          |           |                |          |            |                                          |   |
|                                                                | <i>df</i> | <i>F value</i> | <i>p</i> | Phosphorus | Bonferroni adjusted pairwise comparisons |   |
| LMM plant response<br>(Covariance type:<br>unstructured)       | 4         | 69.273         | <0.001   | 0.5        | 45.6 ± 3.3                               | a |
|                                                                |           |                |          | 2          | 55.4 ± 3                                 | b |
|                                                                |           |                |          | 10         | 121 ± 3                                  | c |
|                                                                |           |                |          | 50         | 220.8 ± 3                                | d |
|                                                                |           |                |          | 100        | 234.9 ± 3                                | d |
| P sequestration rate (μmol P m <sup>-2</sup> d <sup>-1</sup> ) |           |                |          |            |                                          |   |
|                                                                | <i>df</i> | <i>F value</i> | <i>p</i> | Phosphorus | Tukey HSD pairwise comparisons           |   |
| ANOVA                                                          | 4         | 38.549         | <0.001   | 0.5        | 32.3 ± 20                                | a |
|                                                                |           |                |          | 2          | 48.9 ± 16                                | b |
|                                                                |           |                |          | 10         | 361.7 ± 39                               | c |
|                                                                |           |                |          | 50         | 778.4 ± 151                              | d |
|                                                                |           |                |          | 100        | 747.0 ± 90 <sup>c</sup>                  | d |
| N sequestration rate (mmol N m <sup>-2</sup> d <sup>-1</sup> ) |           |                |          |            |                                          |   |
|                                                                | <i>df</i> | <i>F value</i> | <i>p</i> | Phosphorus | Tukey HSD pairwise comparisons           |   |
| ANOVA                                                          | 4         | 13.729         | <0.001   | 0.5        | 2.3 ± 1                                  | a |
|                                                                |           |                |          | 2          | 4.4 ± 0.5                                | a |
|                                                                |           |                |          | 10         | 11.1 ± 1                                 | b |

|                                                           |           |                |          |           |                                |   |
|-----------------------------------------------------------|-----------|----------------|----------|-----------|--------------------------------|---|
|                                                           |           |                |          | 50        | 10.8 ± 1.6                     | b |
|                                                           |           |                |          | 100       | 10.6 ± 1.4                     | b |
| Chlorophyll a + b (mg g <sup>-1</sup> DW) in experiment 2 |           |                |          |           |                                |   |
|                                                           | <i>df</i> | <i>F value</i> | <i>P</i> | Treatment | Tukey HSD pairwise comparisons |   |
| ANOVA                                                     | 2         | 6.747          | <0.02    | C         | 10.8 ± 2                       | a |
|                                                           |           |                |          | Fe        | 15.2 ± 2.3                     | b |
|                                                           |           |                |          | N         | 9.5 ± 2.7                      | a |
| N content (μmol N g <sup>-1</sup> DW) in experiment 2     |           |                |          |           |                                |   |
|                                                           | <i>df</i> | <i>F value</i> | <i>P</i> | Treatment | Tukey HSD pairwise comparisons |   |
| ANOVA                                                     | 2         | 678.127        | <0.001   | C         | 2125 ± 20                      | a |
|                                                           |           |                |          | Fe        | 3000 ± 11                      | c |
|                                                           |           |                |          | N         | 2529 ± 18                      | b |

**Supplementary Table S3.** Results of the 0.5, 2, 10, 50 and 100 μmol P l<sup>-1</sup> treatment (n=5) on the elemental content of *A. filiculoides* on day 21 (μmol g<sup>-1</sup> DW) ±SE. Analyses of Variances (ANOVAs) were used to analyze potential differences in plant elemental contents. Differences between treatments were determined using Tukey HSD post hoc tests. Different letters indicate significant differences.

| Elemental content (μmol g <sup>-1</sup> DW) | <i>F value</i> | Phosphorus treatment (μmol P l <sup>-1</sup> ) |                        |                        |                         |                         |
|---------------------------------------------|----------------|------------------------------------------------|------------------------|------------------------|-------------------------|-------------------------|
|                                             |                | 0.5                                            | 2                      | 10                     | 50                      | 100                     |
| Al                                          | 19.01          | 1.8 ± 0.1 <sup>b</sup>                         | 1.2 ± 0.1 <sup>a</sup> | 0.9 ± 0.1 <sup>a</sup> | 1 ± 0.1 <sup>a</sup>    | 1.04 ± 0.1 <sup>a</sup> |
| Ca                                          | 22.81          | 241 ± 3 <sup>c</sup>                           | 199 ± 3 <sup>b</sup>   | 159 ± 7 <sup>a</sup>   | 159 ± 8 <sup>a</sup>    | 166 ± 12 <sup>a</sup>   |
| Fe                                          | 0.982          | 26.3 ± 2 <sup>a</sup>                          | 23.6 ± 1 <sup>a</sup>  | 25.1 ± 5 <sup>a</sup>  | 18.5 ± 2 <sup>a</sup>   | 21.9 ± 3 <sup>a</sup>   |
| K                                           | 23.702         | 807 ± 15 <sup>a</sup>                          | 965 ± 29 <sup>b</sup>  | 1252 ± 75 <sup>c</sup> | 1179 ± 44 <sup>c</sup>  | 1132 ± 48 <sup>bc</sup> |
| Mg                                          | 8.786          | 142 ± 2 <sup>c</sup>                           | 132 ± 3 <sup>bc</sup>  | 119 ± 4 <sup>a</sup>   | 129 ± 3 <sup>ab</sup>   | 130 ± 2 <sup>ab</sup>   |
| Mn                                          | 3.016          | 145 ± 5 <sup>b</sup>                           | 116 ± 5 <sup>ab</sup>  | 86 ± 10 <sup>a</sup>   | 115 ± 19 <sup>ab</sup>  | 106 ± 16 <sup>ab</sup>  |
| Na                                          | 9.155          | 49.3 ± 1 <sup>a</sup>                          | 55.5 ± 2 <sup>a</sup>  | 79.6 ± 7 <sup>b</sup>  | 103 ± 8 <sup>bc</sup>   | 87.6 ± 7 <sup>b</sup>   |
| P                                           | 363.485        | 34.2 ± 1 <sup>a</sup>                          | 45 ± 1 <sup>b</sup>    | 109 ± 6 <sup>c</sup>   | 196 ± 6 <sup>d</sup>    | 207 ± 3 <sup>d</sup>    |
| S                                           | 7.298          | 139 ± 2 <sup>a</sup>                           | 136 ± 2 <sup>a</sup>   | 162 ± 7 <sup>b</sup>   | 159 ± 5 <sup>b</sup>    | 154 ± 4 <sup>ab</sup>   |
| Si                                          | 2.165          | 16.5 ± 2 <sup>a</sup>                          | 18 ± 2 <sup>a</sup>    | 13 ± 2 <sup>a</sup>    | 11.1 ± 1 <sup>a</sup>   | 17.9 ± 3 <sup>a</sup>   |
| Zn                                          | 41.706         | 37.4 ± 2 <sup>b</sup>                          | 30.8 ± 2 <sup>b</sup>  | 18.6 ± 1 <sup>a</sup>  | 13.2 ± 1 <sup>a</sup>   | 15.6 ± 2 <sup>a</sup>   |
| N                                           | 11.621         | 1890 ± 22 <sup>a</sup>                         | 1875 ± 33 <sup>a</sup> | 2270 ± 78 <sup>b</sup> | 2436 ± 116 <sup>b</sup> | 2254 ± 76 <sup>b</sup>  |

**Supplementary Table S4.** Results of the Fe, N or no addition ( $n=4$ ) on the elemental content of *A. filiculoides* grown at  $100 \mu\text{mol P l}^{-1}$  after 2 weeks of nutrient addition ( $\mu\text{mol g}^{-1} \text{DW}$ )  $\pm$ SE. Analyses of Variances (ANOVAs) were used to analyze potential differences in plant elemental contents. Differences between treatments were determined using Tukey HSD post hoc tests. Different letters indicate significant differences.

| Elemental content ( $\mu\text{mol g}^{-1} \text{DW}$ ) | <i>F</i> value | Control         | Iron            | Nitrogen          |
|--------------------------------------------------------|----------------|-----------------|-----------------|-------------------|
| Al                                                     | 0.943          | $1.2 \pm 0.1^a$ | $1 \pm 0.1^a$   | $1 \pm 0.04^a$    |
| Ca                                                     | 5.683          | $150 \pm 7^a$   | $181 \pm 8^b$   | $161 \pm 5^{ab}$  |
| Fe                                                     | 4.598          | $35.8 \pm 4^a$  | $55.8 \pm 8^b$  | $37.9 \pm 2^{ab}$ |
| K                                                      | 3.381          | $1309 \pm 86^a$ | $1243 \pm 34^a$ | $1095 \pm 46^a$   |
| Mg                                                     | 2.039          | $112 \pm 5^a$   | $111 \pm 2^a$   | $103 \pm 2^a$     |
| Mn                                                     | 2.349          | $107 \pm 4^a$   | $133 \pm 15^a$  | $149 \pm 18^a$    |
| Na                                                     | 16.637         | $107 \pm 5^b$   | $84 \pm 1^a$    | $83 \pm 3^a$      |
| P                                                      | 9.492          | $253 \pm 12^a$  | $298 \pm 4^b$   | $270 \pm 6^b$     |
| S                                                      | 9.005          | $123 \pm 8^a$   | $149 \pm 3^b$   | $121 \pm 4^a$     |
| Si                                                     | 1.334          | $5.6 \pm 0.7^a$ | $5 \pm 0.5^a$   | $4.5 \pm 0.2^a$   |
| Zn                                                     | 1.569          | $27.2 \pm 2^a$  | $25 \pm 2^a$    | $30 \pm 2^a$      |
| N                                                      | 678.127        | $2125 \pm 20^a$ | $3000 \pm 11^c$ | $2529 \pm 18^b$   |
